# Supplementary material for: Distribution and toxicity of dihydroxybenzenes in drinking water sources in Nigeria
Source: Royal Society of Chemistry journal article supplement (doi:10.1039/d3ra04877b), 2024-01-01
Supplement: d3ra04877b1.pdf [file d3ra04877b1.pdf]

## SUPPORTING INFORMATION DOCUMENT

### Distribution and Toxicity of Dihydrobenzenes in Drinking Water Sources in Nigeria

Oluwaferanmi B. Otitoju<sup>1,2</sup>, Moses O. Alfred<sup>1,2\*</sup>, Chidinma G. Olorunnisola<sup>1</sup>, Francis T. Aderinola<sup>3</sup>, Olumuyiwa O. Ogunlaja<sup>1,4</sup>, Olumide D. Olukanni<sup>1,5</sup>, Aemere Ogunlaja<sup>1,6</sup>, Martins O. Omorogie<sup>1,2</sup>, Emmanuel I. Unuabonah<sup>1,2\*</sup>

<sup>1</sup>*African Centre of Excellence for Water and Environmental Research (ACEWATER), Redeemer's University, PMB 230, Ede, Osun State, Nigeria*

<sup>2</sup>*Department of Chemical Sciences, Redeemer's University, PMB 230, Ede, Osun State, Nigeria.*

<sup>3</sup>*Department of Civil Engineering, Redeemer's University, PMB 230, Ede, Osun State, Nigeria*

<sup>4</sup>*Department of Chemical Sciences, Faculty of Natural and Applied Sciences, Lead City University, Ibadan, Nigeria.*

<sup>5</sup>*Department of Biochemistry, Redeemer's University, PMB 230, Ede, Osun State, Nigeria*

<sup>6</sup>*Department of Biological Sciences, Redeemer's University, PMB 230, Ede, Osun State, Nigeria*

#### Corresponding authors

Emmanuel I. Unuabonah [unuabonahe@run.edu.ng](mailto:unuabonahe@run.edu.ng) Tel: +234 805 317 5971

Moses O. Alfred [alfredm@run.edu.ng](mailto:alfredm@run.edu.ng) Tel: +234 903 878 7959

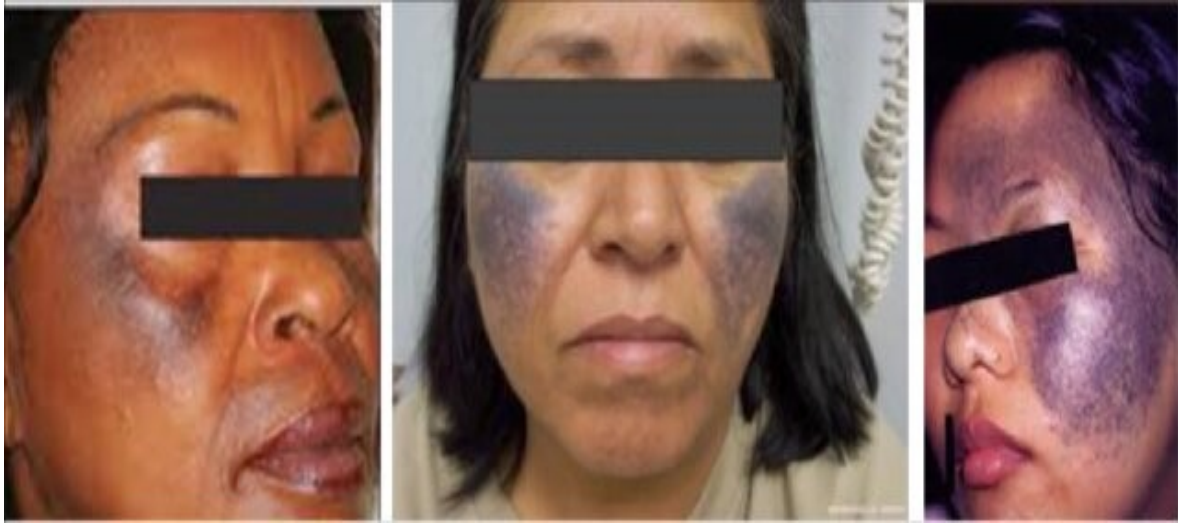

**Figure S1:** Images showing the adverse effect of Hydroquinone on the human skin .

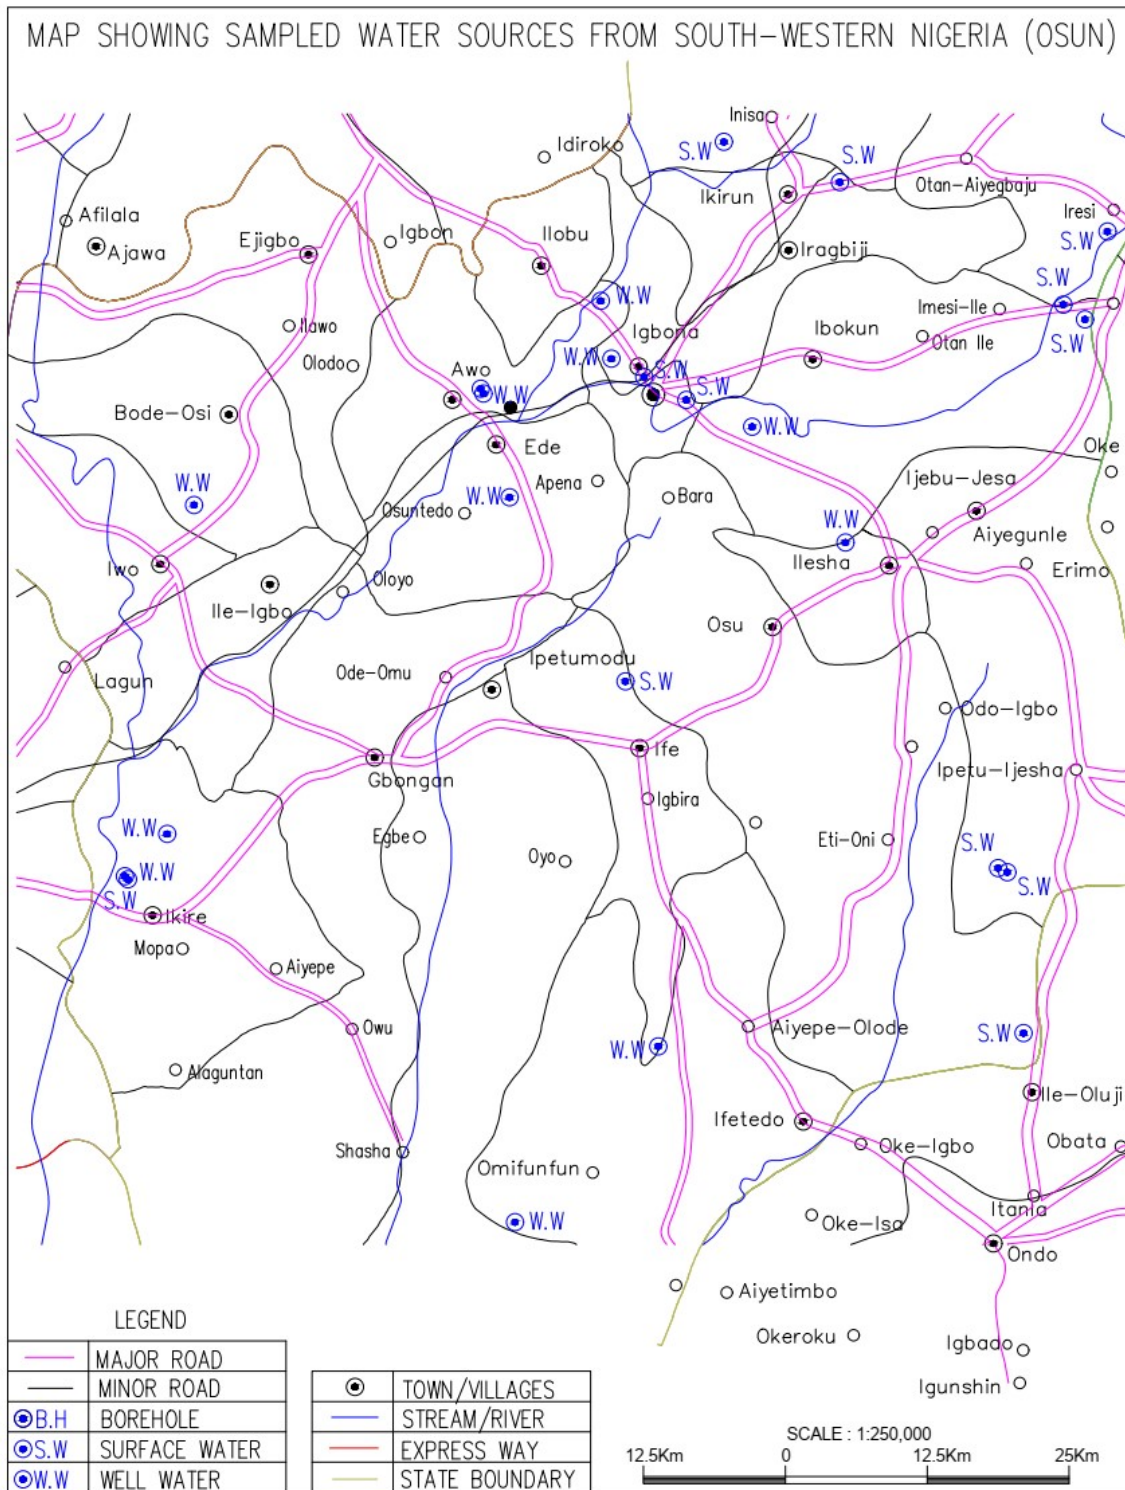

Figure S2: Geographical map showing the sampling sites for Osun State, Nigeria

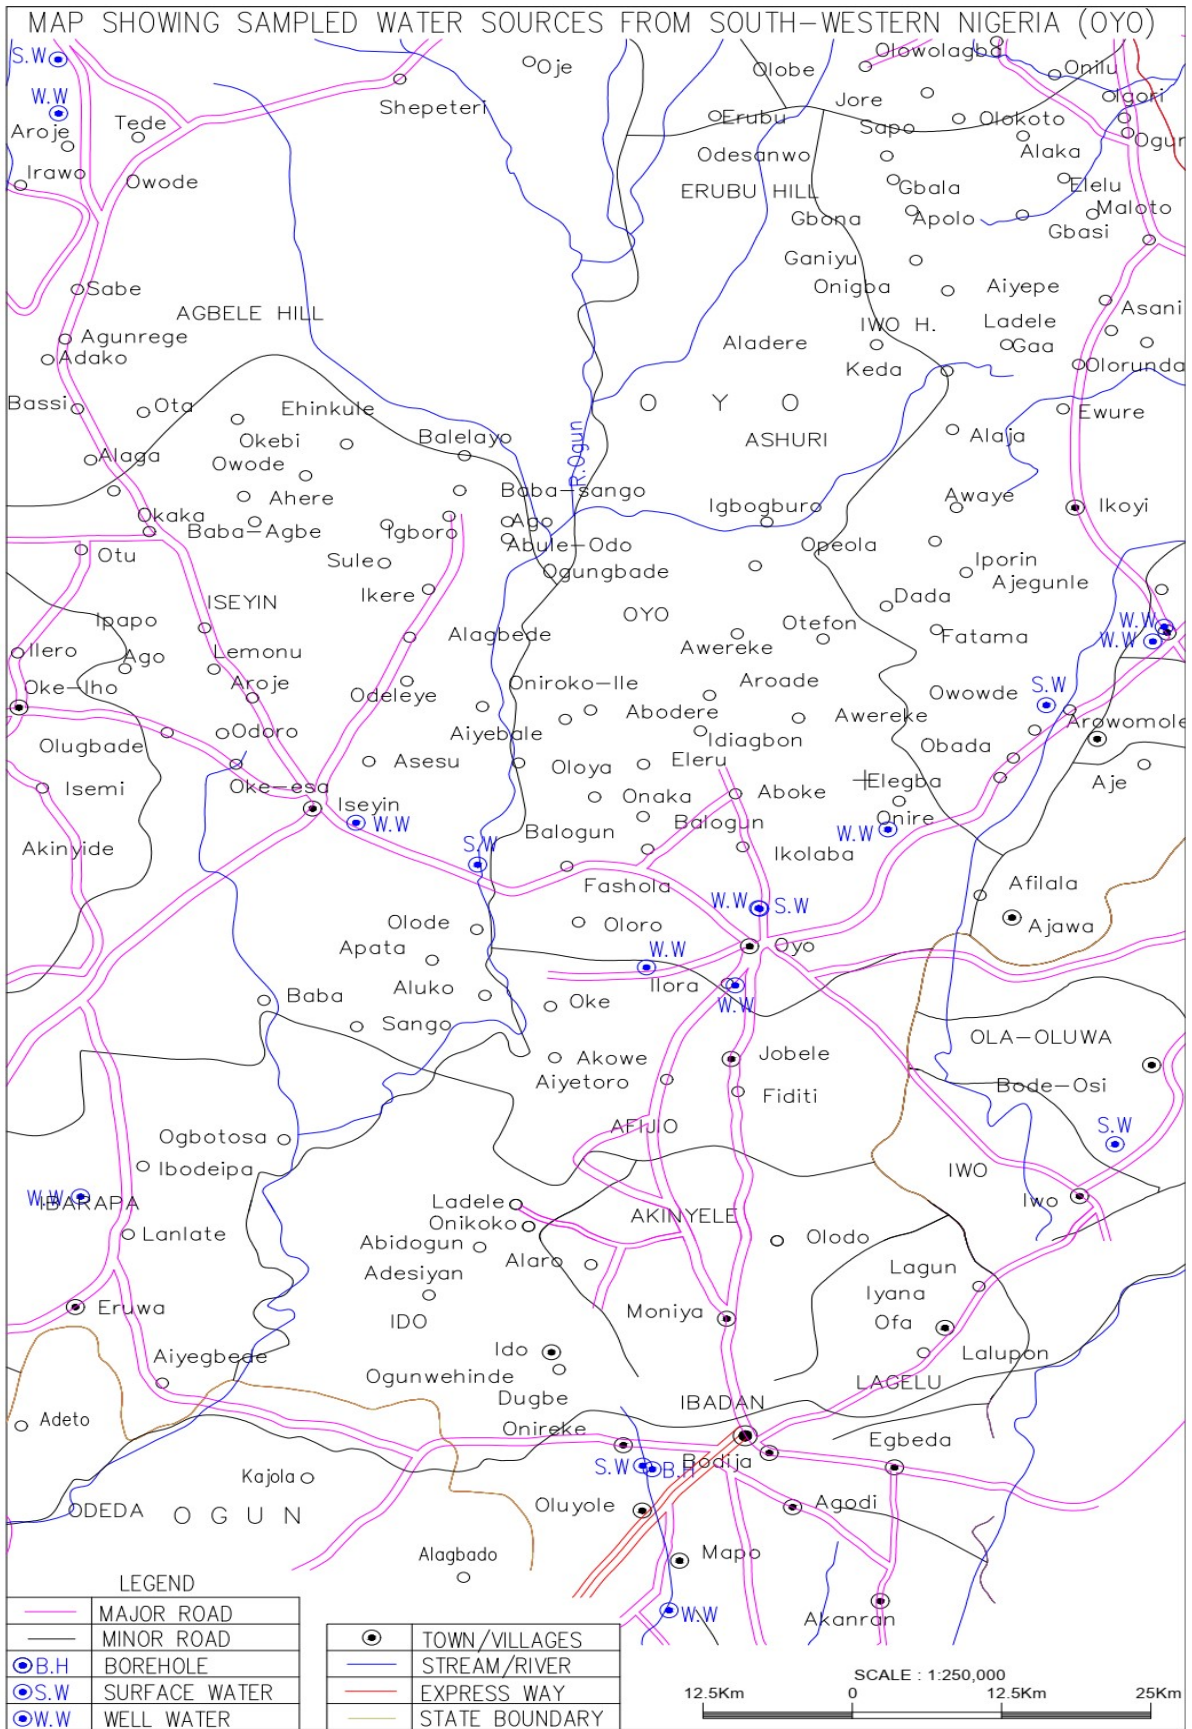

**Figure S3:** Geographical map showing the sampling sites for Oyo State, Nigeria



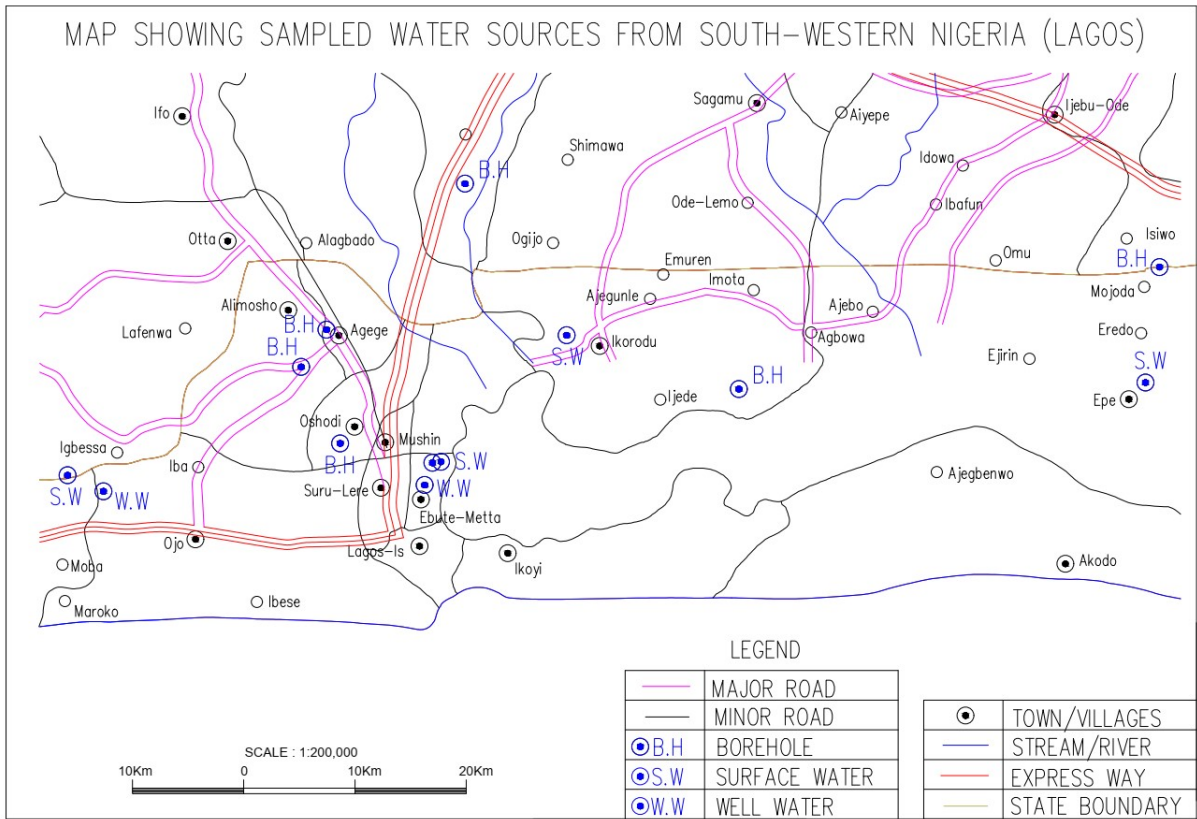

**Figure S4:** Geographical map showing the sampling sites for Lagos State, Nigeria

**Table S1:** Ecological Risks Assessment of Groundwater and Surface water samples during the Rainy Season in the Different States

| Type of water                    | Organism | Phenol | RQ <sub>acute</sub> range | <0.1 (%) | 0.1-1.0 (%) | 1-above (%) | RQ <sub>chronic</sub> range | <0.1(%) | 0.1-1 (%) | 1-above (%) |
|----------------------------------|----------|--------|---------------------------|----------|-------------|-------------|-----------------------------|---------|-----------|-------------|
| <b>Osun State (Rainy Season)</b> |          |        |                           |          |             |             |                             |         |           |             |
| Groundwater                      | Algae    | CAT    | 4.69-32.35                | 0.0      | 0.0         | 100.0       | 1.03-7.12                   | 0.0     | 0.0       | 100.0       |
|                                  |          | HQ     | 3.14-23.05                | 0.0      | 0.0         | 100.0       | 0.31-2.29                   | 0.0     | 44.4      | 55.6        |
|                                  | Daphnia  | CAT    | 60.82-418.69              | 0.0      | 0.0         | 100.0       | 6.08-41.86                  | 0.0     | 0.0       | 100.0       |
|                                  |          | HQ     | 7.73-56.74                | 0.0      | 0.0         | 100.0       | 18.19-132.58                | 0.0     | 0.0       | 100.0       |
|                                  | Fish     | CAT    | 11.62-79.97               | 0.0      | 0.0         | 100.0       | 1.16-7.99                   | 0.0     | 0.0       | 100.0       |
|                                  |          | HQ     | 1.63-11.92                | 0.0      | 0.0         | 100.0       | 15.71-115.24                | 0.0     | 0.0       | 100.0       |
| <b>SURFACE WATER</b>             |          |        |                           |          |             |             |                             |         |           |             |
| Surface water                    | Algae    | CAT    | 1.29-35.86                | 0.0      | 0.0         | 100.0       | 0.28-7.89                   | 0.0     | 16.7      | 83.3        |
|                                  |          | HQ     | 7.14-41.72                | 0.0      | 0.0         | 100.0       | 0.74-4.17                   | 0       | 25.0      | 75.0        |
|                                  | Daphnia  | CAT    | 16.69-529.05              | 0.0      | 0           | 100.0       | 1.67-52.90                  | 0.0     | 0.0       | 100.0       |
|                                  |          | HQ     | 18.76-102.73              | 0.0      | 0           | 100.0       | 42.93-241.51                | 0.0     | 0         | 100.0       |
|                                  | Fish     | CAT    | 3.18-101.05               | 0.0      | 0           | 100.0       | 0.32-10.10                  | 0.0     | 16.7      | 83.3        |
|                                  |          | HQ     | 3.85-21.57                | 0.0      | 0           | 100.0       | 37.07-208.58                | 0.0     | 0         | 100.0       |
| <b>Oyo State (Rainy Season)</b>  |          |        |                           |          |             |             |                             |         |           |             |
| Groundwater                      | Algae    | CAT    | 0.14-5.14                 | 0.0      | 20.0        | 80.0        | 0.01-0.51                   | 20.0    | 80.0      | 0.0         |
|                                  |          | HQ     | 1.63-9.62                 | 0.0      | 0.0         | 100.0       | 0.16-0.96                   | 0.0     | 100.0     | 0.0         |
|                                  | Daphnia  | CAT    | 1.94-66.48                | 0.0      | 0.0         | 100.0       | 0.19-6.65                   | 0.0     | 20.0      | 80.0        |
|                                  |          | HQ     | 4.04-23.70                | 0.0      | 0.0         | 100.0       | 9.49-55.73                  | 0.0     | 0.0       | 100.0       |
|                                  | Fish     | CAT    | 0.37-12.69                | 0.0      | 20.0        | 80.0        | 0.03-1.26                   | 0.0     | 75.0      | 25.0        |
|                                  |          | HQ     | 0.84-4.97                 | 8.3      | 0.0         | 91.7        | 8.19-48.14                  | 0.0     | 0.0       | 100.0       |
| <b>SURFACE WATER</b>             |          |        |                           |          |             |             |                             |         |           |             |

|                                   |        |     |              |      |      |       |               |      |       |       |
|-----------------------------------|--------|-----|--------------|------|------|-------|---------------|------|-------|-------|
| Surface water                     | Algae  | CAT | 0.05-3.23    | 12.5 | 75.0 | 12.5  | 0.005-0.32    | 75.0 | 25.0  | 0.0   |
|                                   |        | HQ  | 4.31-13.62   | 0.0  | 0.0  | 100.0 | 0.43-1.36     | 0.0  | 80.0  | 20.0  |
|                                   |        |     |              |      |      |       |               |      |       |       |
|                                   | Daphia | CAT | 0.70-22.01   | 0.0  | 12.5 | 87.5  | 0.070-4.18    | 12.5 | 62.5  | 25.0  |
|                                   |        | HQ  | 10.63-33.54  | 0.0  | 0.0  | 100.0 | 24.99-78.86   | 0.0  | 0.0   | 100.0 |
|                                   |        |     |              | 0.0  |      |       |               |      |       |       |
|                                   | Fish   | CAT | 0.13-7.99    | 0.0  | 50.0 | 50.0  | 0.01-0.42     | 0.0  | 50.0  | 50.0  |
|                                   |        | HQ  | 2.23-7.04    | 0.0  | 0.0  | 100.0 | 22.10-68.11   | 0.0  | 0.0   | 100.0 |
| <b>Lagos State (Rainy Season)</b> |        |     |              |      |      |       |               |      |       |       |
| Groundwater                       | Algae  | CAT | 3.43-9.48    | 0.0  | 0.0  | 100.0 | 0.34-0.94     | 0.0  | 100.0 | 0.0   |
|                                   |        | HQ  | 1.01-8.39    | 0.0  | 0.0  | 100.0 | 0.10-0.84     | 0.0  | 100.0 | 0.0   |
|                                   |        |     |              |      |      |       |               |      |       |       |
|                                   | Daphia | CAT | 44.39-122.66 | 0.0  | 0.0  | 100.0 | 4.44-12.26    | 0.0  | 0.0   | 100.0 |
|                                   |        | HQ  | 2.47-20.67   | 33.3 | 55.6 | 11.1  | 5.83-48.59    | 0.0  | 0.0   | 100.0 |
|                                   |        |     |              |      |      |       |               |      |       |       |
|                                   | Fish   | CAT | 8.48-23.43   | 0.0  | 0.0  | 100.0 | 0.85-2.34     | 0.0  | 50.0  | 50.0  |
|                                   |        | HQ  | 0.52-4.34    | 0.0  | 50.0 | 50.0  | 5.03-41.96    | 0.0  | 0.0   | 100.0 |
| <b>SURFACE WATER</b>              |        |     |              |      |      |       |               |      |       |       |
| Surface water                     | Algae  | CAT | 1.87-31.46   | 0.0  | 0.0  | 100.0 | 0.19-4.67     | 0.0  | 50.0  | 50.0  |
|                                   |        | HQ  | 25.42-101.75 | 0.0  | 0.0  | 100.0 | 2.10-10.17    | 0.0  | 0.0   | 100.0 |
|                                   |        |     |              |      |      |       |               |      |       |       |
|                                   | Daphia | CAT | 24.19-603.90 | 0.0  | 0.0  | 100.0 | 2.41-60.39    | 0.0  | 0.0   | 100.0 |
|                                   |        | HQ  | 51.75-250.58 | 0.0  | 0.0  | 100.0 | 121.66-589.09 | 0.0  | 0.0   | 100.0 |
|                                   |        |     |              |      |      |       |               |      |       |       |
|                                   | Fish   | CAT | 4.62-115.35  | 0.0  | 0.0  | 100.0 | 0.46-11.53    | 0.0  | 16.6  | 82.4  |
|                                   |        | HQ  | 10.86-13.15  | 0.0  | 0.0  | 100.0 | 105.07-508.76 | 0.0  | 0.0   | 100.0 |

**Table S2:** Ecological Risks Assessment of Groundwater and Surface water samples during the Dry Season in the Different States

| Type of water                  | Organism | Phenol | RQ <sub>acute</sub> range | <0.1 (%) | 0.1-1.0 (%) | 1-above (%) | RQ <sub>chronic</sub> range | <0.1(%) | 0.1-1 (%) | 1-above (%) |
|--------------------------------|----------|--------|---------------------------|----------|-------------|-------------|-----------------------------|---------|-----------|-------------|
| <b>Osun State (Dry Season)</b> |          |        |                           |          |             |             |                             |         |           |             |
| Groundwater                    | Algae    | CAT    | 0.01-3.45                 | 16.7     | 16.7        | 66.6        | 0.001-0.35                  | 33.4    | 66.6      | 0.0         |
|                                |          | HQ     | 3.18-30.93                | 0.0      | 0.0         | 100.0       | 0.32-3.09                   | 0.0     | 25.0      | 75.0        |
|                                | Daphnia  | CAT    | 0.17-44.70                | 0.0      | 16.7        | 83.3        | 0.017-4.47                  | 16.7    | 16.7      | 66.6`       |
|                                |          | HQ     | 7.83-76.16                | 0.0      | 0.0         | 100.0       | 18.42-179.06                | 0.0     | 0.0       | 100.0       |
|                                | Fish     | CAT    | 0.03-8.54                 | 16.7     | 16.7        | 66.6`       | 0.003-0.85                  | 33.4    | 66.6      | 0.0         |
|                                |          | HQ     | 1.65-15.99                | 0.0      | 0.0         | 100.0       | 15.90-154.64                | 0.0     | 0.0       | 100.0       |
| <b>SURFACE WATER</b>           |          |        |                           |          |             |             |                             |         |           |             |
| Surface water                  | Algae    | CAT    | 0.63-8.97                 | 0        | 14.3        | 85.7        | 0.06-0.87                   | 14.3    | 85.7      | 0           |
|                                |          | HQ     | 0.02-34.05                | 20.0     | 0.0         | 80.0        | 0.001-3.40                  | 20.0    | 20.0      | 60.0        |
|                                | Daphnia  | CAT    | 8.15-116.08               | 0.0      | 0           | 100.0       | 0.82-11.60                  | 0       | 14.3      | 85.7        |
|                                |          | HQ     | 0.04-83.85                | 20.0     | 0.0         | 80.0        | 0.11-197.11                 | 20.0    | 0.0       | 80.0        |
|                                | Fish     | CAT    | 1.5-22.17                 | 0.0      | 0           | 100.0       | 0.15-2.22                   | 0.0     | 57.2      | 42.8        |
|                                |          | HQ     | 0.01-17.61                | 20.0     | 0.0         | 80.0        | 0.09-170.34                 | 20.0    | 0.0       | 80.0        |
| <b>Oyo State (Dry Season)</b>  |          |        |                           |          |             |             |                             |         |           |             |
| Groundwater                    | Algae    | CAT    | 0.95-18.44                | 0.0      | 20.0        | 80.0        | 0.09-1.84                   | 20.0    | 60.0      | 20.0        |
|                                |          | HQ     | 0.97-9.90                 | 0.0      | 25.0        | 75.0        | 0.09-0.99                   | 25.0    | 75.0      | 0.0         |
|                                | Daphia   | CAT    | 12.28-238.67              | 0.0      | 0.0         | 100.0       | 1.23-23.87                  | 0.0     | 0.0       | 100.0       |
|                                |          | HQ     | 2.39-24.39                | 0.0      | 0.0         | 100.0       | 5.60-57.35                  | 0.0     | 0.0       | 100.0       |
|                                | Fish     | CAT    | 2.35-45.58                | 0.0      | 0,0         | 100.0       | 0.23-4.56                   | 0.0     | 60.0      | 40.0        |
|                                |          | HQ     | 0.50-5.12                 | 0.0      | 50.0        | 50.0        | 4.84-49.52                  | 0.0     | 0.0       | 100.0       |



| <b>SURFACE WATER</b>            |        |     |              |     |      |       |             |      |      |       |
|---------------------------------|--------|-----|--------------|-----|------|-------|-------------|------|------|-------|
| Surface water                   | Algae  | CAT | 6.25-37.94   | 0.0 | 0.0  | 100.0 | 0.63-3.79   | 0.0  | 42.8 | 57.2  |
|                                 |        | HQ  | 1.10-18.53   | 0.0 | 0.0  | 100.0 | 0.11-1.85   | 0.0  | 75.0 | 25.0  |
|                                 |        |     |              |     |      |       |             |      |      |       |
|                                 | Daphia | CAT | 80.94-491.10 | 0.0 | 0.0  | 100.0 | 8.09-49.11  | 0.0  | 0.0  | 100.0 |
|                                 |        | HQ  | 2.73-45.64   | 0.0 | 0.0  | 100.0 | 6.42-107.29 | 0.0  | 0.0  | 100.0 |
|                                 |        |     |              | 0.0 |      |       |             |      |      |       |
|                                 | Fish   | CAT | 0.57-9.58    | 0.0 | 25.0 | 75.0  | 5.55-92.66  | 0.0  | 0.0  | 100.0 |
|                                 |        | HQ  | 0.07-7.2     | 8.4 | 8.4  | 83.2  | 0.009-1.0   | 8.4  | 83.2 | 20.   |
| <b>Lagos State (Dry Season)</b> |        |     |              |     |      |       |             |      |      |       |
| Groundwater                     | Algae  | CAT | 1.43-10.40   | 0.0 | 0.0  | 100.0 | 0.14-1.04   | 0.0  | 91.7 | 8.3   |
|                                 |        | HQ  | 0.65-12.14   | 0.0 | 9.1  | 90.9  | 0.06-1.21   | 9.1  | 72.7 | 18.2  |
|                                 |        |     |              |     |      |       |             |      |      |       |
|                                 | Daphia | CAT | 18.45-134.62 | 0.0 | 0.0  | 100.0 | 1.85-13.46  | 0.0  | 0.0  | 100.0 |
|                                 |        | HQ  | 1.62-29.89   | 0.0 | 0.0  | 100.0 | 3.82-70.26  | 0.0  | 0.0  | 100.0 |
|                                 |        |     |              |     |      |       |             |      |      |       |
|                                 | Fish   | CAT | 23.52-25.71  | 0.0 | 0.0  | 100.0 | 0.35-2.57   | 0.0  | 25.0 | 75.0  |
|                                 |        | HQ  | 0.34-6.28    | 0.0 | 27.3 | 72.7  | 3.29-60.67  | 0.0  | 0.0  | 100.0 |
| <b>SURFACE WATER</b>            |        |     |              |     |      |       |             |      |      |       |
| Surface water                   | Algae  | CAT | 0.11-42.78   | 0.0 | 14.3 | 85.7  | 0.01-4.28   | 0.0  | 71.4 | 28.6  |
|                                 |        | HQ  | 0.78-70.60   | 0.0 | 12.5 | 87.5  | 0.078-7.06  | 12.5 | 62.5 | 25.0  |
|                                 |        |     |              |     |      |       |             |      |      |       |
|                                 | Daphia | CAT | 1.36-553.68  | 0.0 | 0.0  | 100.0 | 0.14-55.37  | 0.0  | 8.3  | 91.7  |
|                                 |        | HQ  | 1.92-39.71   | 0.0 | 0.0  | 100.0 | 4.52-408.77 | 0.0  | 0.0  | 100.0 |
|                                 |        |     |              |     |      |       |             |      |      |       |
|                                 | Fish   | CAT | 0.26-105.76  | 0.0 | 8.3  | 91.7  | 0.03-10.57  | 8.3  | 8.3  | 83.4  |
|                                 |        | HQ  | 0.40-36.52   | 0.0 | 25.0 | 75.0  | 3.91-353.04 | 0.0  | 0.0  | 100.0 |

**Table S3: Summary of the concentration of the hydroquinone and catechol in individual states.**

| State | Season        | Water samples |              | Hydroquinone | Catechol |
|-------|---------------|---------------|--------------|--------------|----------|
| Osun  | Wet           | groundwater   | Mean         | 53           | 430      |
|       |               |               | Minimum      | 24           | n.d      |
|       |               |               | Maximum      | 137          | 899      |
|       |               |               | Median       | 46           | 0        |
|       |               |               | Frequency(%) | 100          | 42       |
|       | Surface water | Mean          | 47           | 430          |          |
|       |               | Minimum       | n.d          | 115          |          |
|       |               | Maximum       | 76           | 712          |          |
|       |               | Median        | 24           | 369          |          |
|       |               | Frequency(%)  | 75           | 100          |          |
| Dry   | groundwater   | Mean          | 47           | 102          |          |
|       |               | Minimum       | n.d          | n.d          |          |
|       |               | Maximum       | 112          | 197          |          |
|       |               | Median        | n.d          | 26           |          |
|       |               | Frequency(%)  | 42           | 58           |          |
|       | Surface water | Mean          | 47           | 39           |          |
|       |               | Minimum       | n.d          | n.d          |          |
|       |               | Maximum       | 102          | 57           |          |
|       |               | Median        | 23           | 0.3          |          |
|       |               | Frequency(%)  | 67           | 55           |          |
| Oyo   | wet           | groundwater   | Mean         | 22           | 43       |
|       |               |               | Minimum      | 8            | n.d      |
|       |               |               | Maximum      | 32           | 113      |

|       |                 |              |     |      |
|-------|-----------------|--------------|-----|------|
|       |                 | Median       | 24  | 0    |
|       |                 | Frequency(%) | 100 | 33   |
|       |                 |              |     |      |
|       | Surface water   | Mean         | 26  | 43   |
|       |                 | Minimum      | 14  | n.d  |
|       |                 | Maximum      | 45  | 71   |
|       |                 | Median       | 26  | 7    |
|       |                 | Frequency(%) | 100 | 80   |
|       |                 |              |     |      |
|       | Dry groundwater | Mean         | 5   | 175  |
|       |                 | Minimum      | n.d | n.d  |
|       |                 | Maximum      | 33  | 405  |
|       |                 | Median       | 0   | 0    |
|       |                 | Frequency(%) | 40  | 36   |
|       |                 |              |     |      |
|       | Surface water   | Mean         | 9   | 412  |
|       |                 | Minimum      | n.d | 0    |
|       |                 | Maximum      | 61  | 834  |
|       |                 | Median       | 0   | 158  |
|       |                 | Frequency(%) | 40  | 70   |
|       |                 |              |     |      |
| Lagos | wet groundwater | Mean         | 13  | 126  |
|       |                 | Minimum      | n.d | n.d  |
|       |                 | Maximum      | 28  | 208  |
|       |                 | Median       | 0   | 0    |
|       |                 | Frequency(%) | 25  | 33   |
|       |                 |              |     |      |
|       | Surface water   | Mean         | 43  | 123  |
|       |                 | Minimum      | n.d | n.d  |
|       |                 | Maximum      | 335 | 1026 |
|       |                 | Median       | 0   | 107  |
|       |                 | Frequency(%) | 30  | 60   |

|     |               |              |     |     |
|-----|---------------|--------------|-----|-----|
|     |               |              |     |     |
| Dry | groundwater   | Mean         | 12  | 126 |
|     |               | Minimum      | n.d | n.d |
|     |               | Maximum      | 40  | 228 |
|     |               | Median       | 10  | 84  |
|     |               | Frequency(%) | 83  | 67  |
|     |               |              |     |     |
|     | Surface water | Mean         | 13  | 260 |
|     |               | Minimum      | n.d | n.d |
|     |               | Maximum      | 233 | 941 |
|     |               | Median       | 10  | 135 |
|     |               | Frequency(%) | 89  | 78  |

#### Reference

[1] L.M. Davids, J. Van Wyk, N.P. Khumalo, N.G.J.S.A.J.o.S. Jablonski, The phenomenon of skin lightening: Is it right to be light?, 112 (2016) 1-5.
